# Supplementary material
Source: PubMed Central journal article supplement (PMC6178949)
Supplement: NIHMS91171-supplement-1_si_001.pdf [file NIHMS91171-supplement-1_si_001.pdf]

## Supplemental Figures

**Figure 1S.** Time evolution of the fluorescence emission spectra. (A) 15  $\mu\text{M}$   $\text{dT}_{12}$  with 90  $\mu\text{M}$   $\text{Ag}^+$  and 90  $\mu\text{M}$   $\text{BH}_4^-$  in a pH = 10.5 buffer using  $\lambda_{\text{ex}} = 340 \text{ nm}/\lambda_{\text{em}} = 540 \text{ nm}$ . (B) 15  $\mu\text{M}$   $\text{dT}_4\text{C}_4\text{T}_4$  with 90  $\mu\text{M}$   $\text{Ag}^+$  and 90  $\mu\text{M}$   $\text{BH}_4^-$  in a pH = 10.5 buffer using  $\lambda_{\text{ex}} = 360 \text{ nm}/\lambda_{\text{em}} = 475 \text{ nm}$ .

**Figure 2S.** Dependence of the fluorescence intensity with the relative concentration of  $\text{Ag}^+$ :oligonucleotide for  $\text{dT}_{12}$  (A) and  $\text{dT}_4\text{C}_4\text{T}_4$  (B). The concentrations of the oligonucleotides were 15  $\mu\text{M}$ , and the pH of the buffer was 10.5. One equivalent of  $\text{BH}_4^-$  was used for one equivalent of  $\text{Ag}^+$ . For  $\text{dT}_{12}$  and  $\text{dT}_4\text{C}_4\text{T}_4$ ,  $\lambda_{\text{ex}} = 340 \text{ nm}/\lambda_{\text{em}} = 540 \text{ nm}$  and  $\lambda_{\text{ex}} = 360 \text{ nm}/\lambda_{\text{em}} = 475 \text{ nm}$ , respectively.

**Figure 3S.** Induced circular dichroism and absorption spectra for the electronic transitions of the cluster-oligonucleotide conjugates. The solid line (left axis) represents the circular dichroism spectrum, and the dashed line (right axis) represents the absorption spectrum. (A) 15  $\mu\text{M}$   $\text{dT}_{12}$  with 90  $\mu\text{M}$   $\text{Ag}^+$  and 90  $\mu\text{M}$   $\text{BH}_4^-$ . (B) 15  $\mu\text{M}$   $\text{dT}_4\text{C}_4\text{T}_4$  with 90  $\mu\text{M}$   $\text{Ag}^+$  and 90  $\mu\text{M}$   $\text{BH}_4^-$ .

**Figure 4S:** Fluorescence intensity (circles) of the  $\lambda_{\text{ex}} = 340 \text{ nm}/\lambda_{\text{em}} = 540 \text{ nm}$  fluorescence species and the absorbance (crosses) at 430 nm as a function of time for a sample with 6  $\text{Ag}^+:\text{dT}_{12}$  in a buffer with pH = 10.5. The data sets were fitted using single exponential functions. The rate is 0.004 /s for the fluorescence, and the rate is 0.005 /s for the absorbance.

**Figure 5S.** Absorption spectrum of 15  $\mu\text{M}$   $\text{dT}_{12}$  with 90  $\mu\text{M}$   $\text{Ag}^+$  and 90  $\mu\text{M}$   $\text{BH}_4^-$  in a pH = 10.5 buffer. The dotted line represents the spectrum in a nitrogen saturated sample while the solid line represents the spectrum in an oxygen saturated sample.

**Figure 6S.** Fluorescence spectrum were collected using  $\lambda_{\text{ex}} = 340 \text{ nm}$  for a sample with 15  $\mu\text{M}$   $\text{dT}_{12}$  with 90  $\mu\text{M}$   $\text{Ag}^+$  and 90  $\mu\text{M}$   $\text{BH}_4^-$  in a pH = 10.5 buffer. The dotted line represents the spectrum in the air saturated sample while the solid line represents the spectrum in the  $\text{O}_2$  saturated sample.

**Figure 7S.** Fluorescence spectra in solutions saturated with nitrogen (dashed line) and in same nitrogen-saturated solutions that were subsequently saturated with oxygen (solid line). The conditions were 15  $\mu\text{M}$   $\text{dT}_4\text{C}_4\text{T}_4$  with 90  $\mu\text{M}$   $\text{Ag}^+$  and 90  $\mu\text{M}$   $\text{BH}_4^-$  in a pH = 10.5 buffer.

**Figure 8S:** Fluorescence quantum yield measurements for the cluster- $\text{dT}_4\text{C}_4\text{T}_4$  conjugates. Using  $\lambda_{\text{ex}} = 370 \text{ nm}$ , the fluorescence intensity at 475 nm is plotted as a function of the absorbance at 370 nm. The sample has 6  $\text{Ag}^+:\text{dT}_4\text{C}_4\text{T}_4$  in a pH = 10.5 buffer. The slopes are  $4.2 (\pm 0.1) \times 10^7 \text{ c/s}$  (intercept = 70000 +/- 14000) for quinine and  $1.1 (\pm 0.1) \times 10^7 \text{ c/s}$  (intercept = 35000 +/- 140000) for the silver clusters.

**Figure 9S.** Fluorescence emission intensities as a function of the excitation power for a 10X diluted sample of 15  $\mu\text{M}$   $\text{dT}_4\text{C}_4\text{T}_4$  with 90  $\mu\text{M}$   $\text{Ag}^+$  and 90  $\mu\text{M}$   $\text{BH}_4^-$  in a  $\text{pH} = 10.5$  buffer. The 30  $\mu\text{W}$  power used for these studies is indicated by the vertical line.

**Figure 10S.** (A) A composite fluorescence spectrum of 0.5  $\mu\text{M}$   $\text{dC}_4\text{T}_4\text{C}_4$  with 90  $\mu\text{M}$   $\text{Ag}^+$  and 90  $\mu\text{M}$   $\text{BH}_4^-$  in water. The emission wavelengths are on the bottom axis and the excitation wavelengths are on the right axis. The spectra were acquired 16 hrs after adding  $\text{BH}_4^-$ . (B) Fluorescence spectra in solutions saturated with nitrogen (dashed line) and in same nitrogen-saturated solutions that were subsequently saturated with oxygen (solid line). (C) Fluorescence intensities of the  $\lambda_{\text{ex}} = 340 \text{ nm}/\lambda_{\text{em}} = 495 \text{ nm}$  band as a function of  $\text{pH}$ .

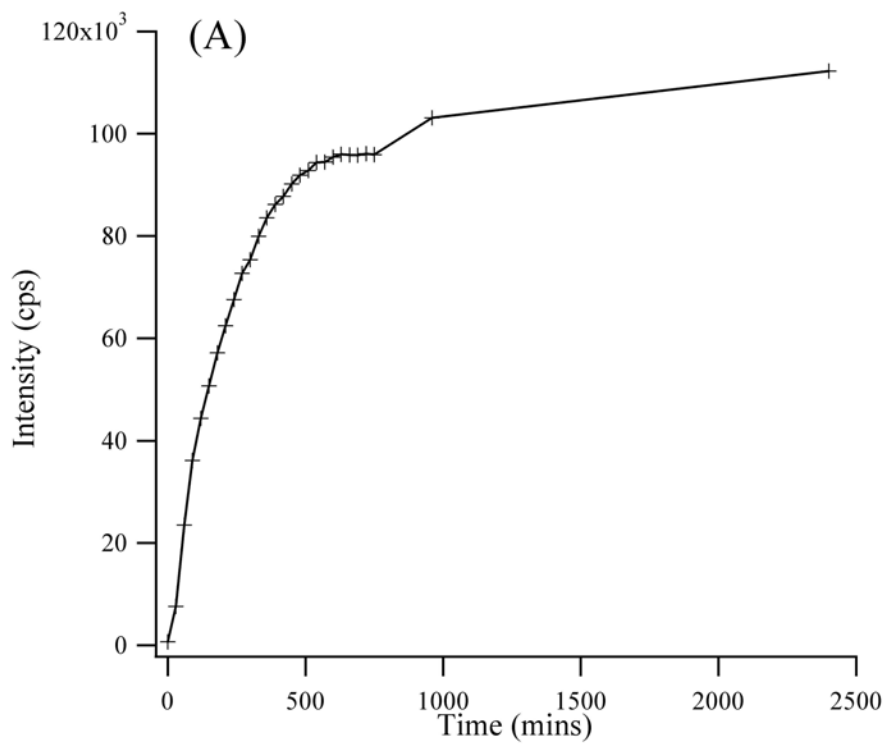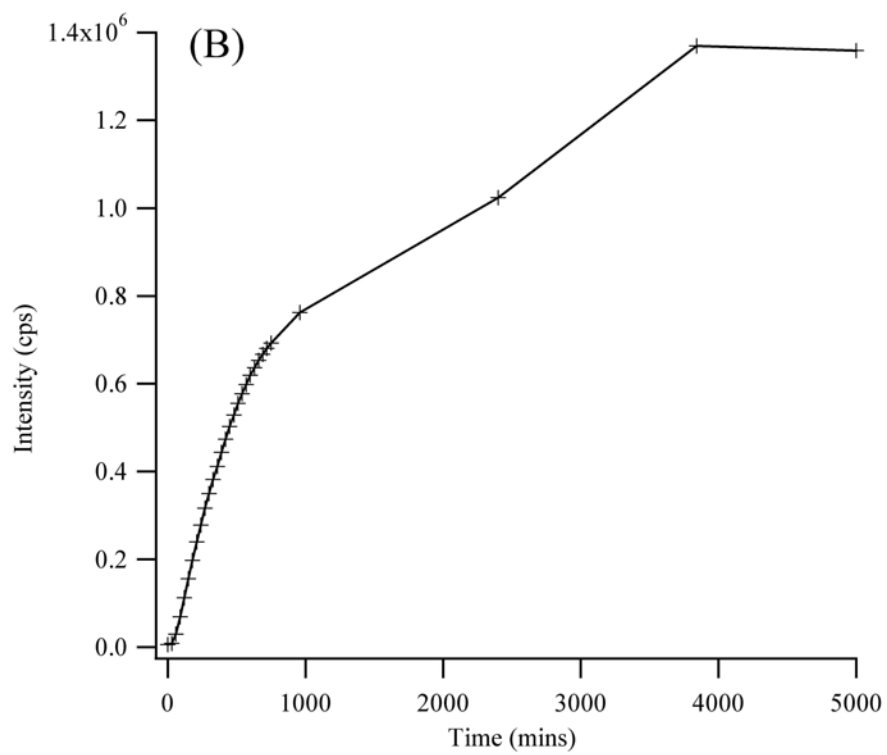

Figure 1S

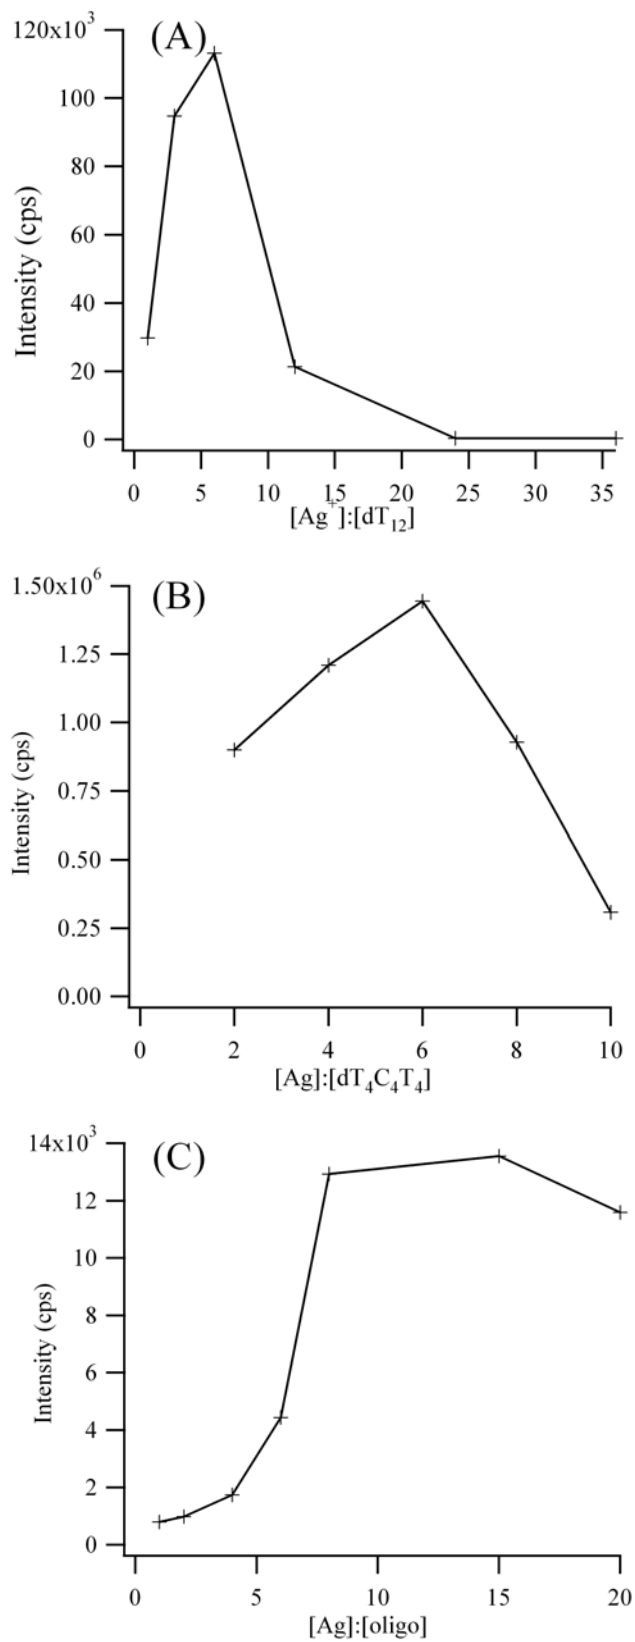

Figure 2S

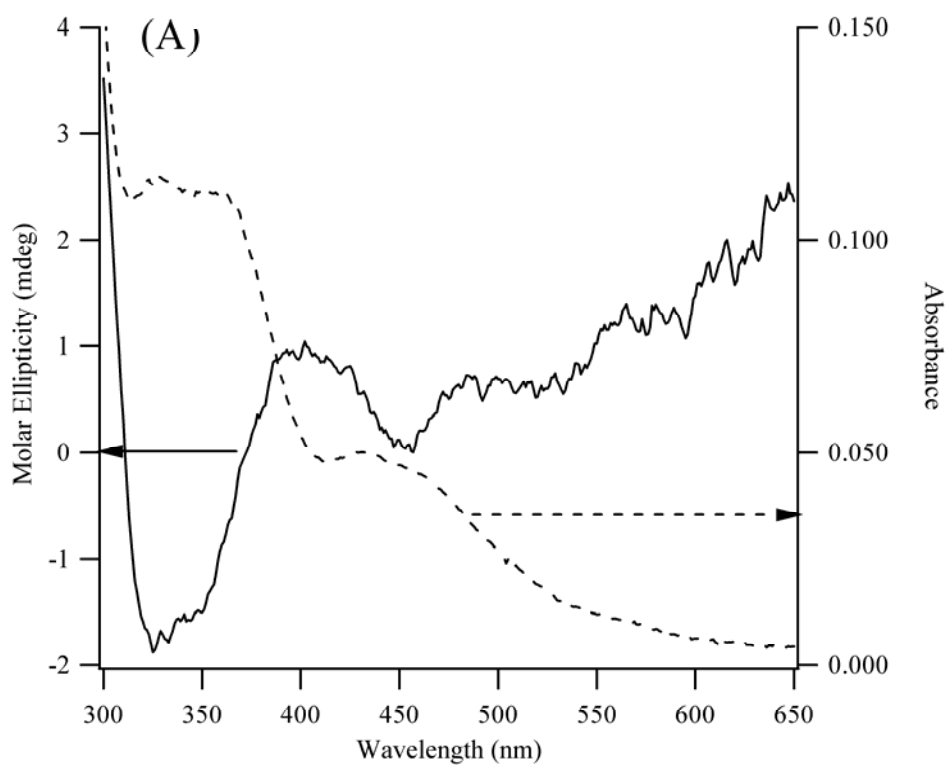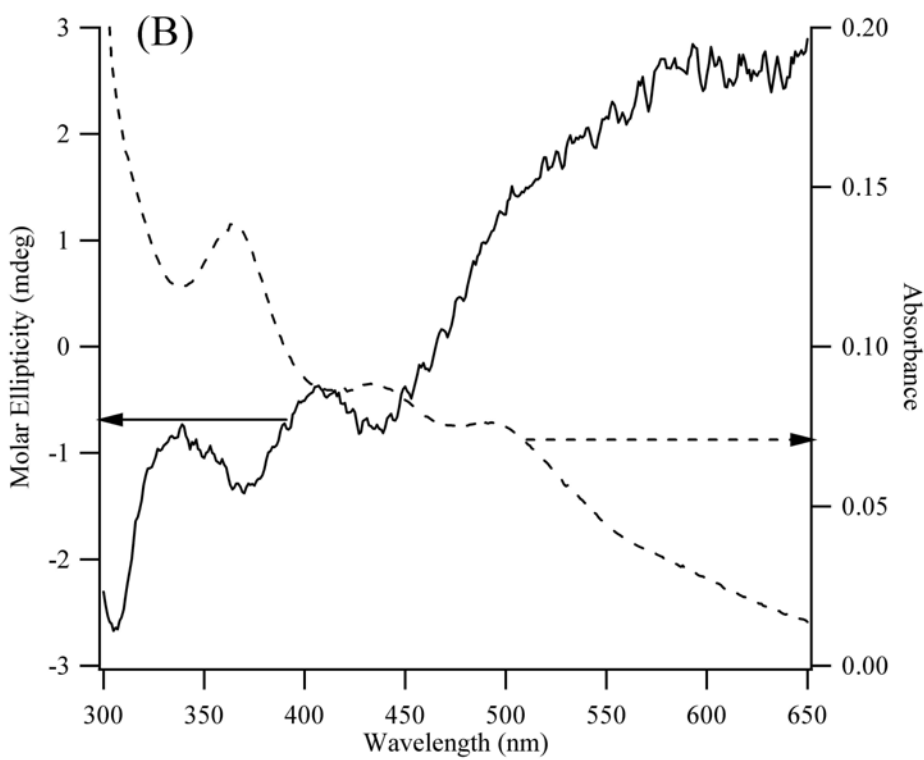

Figure 3S

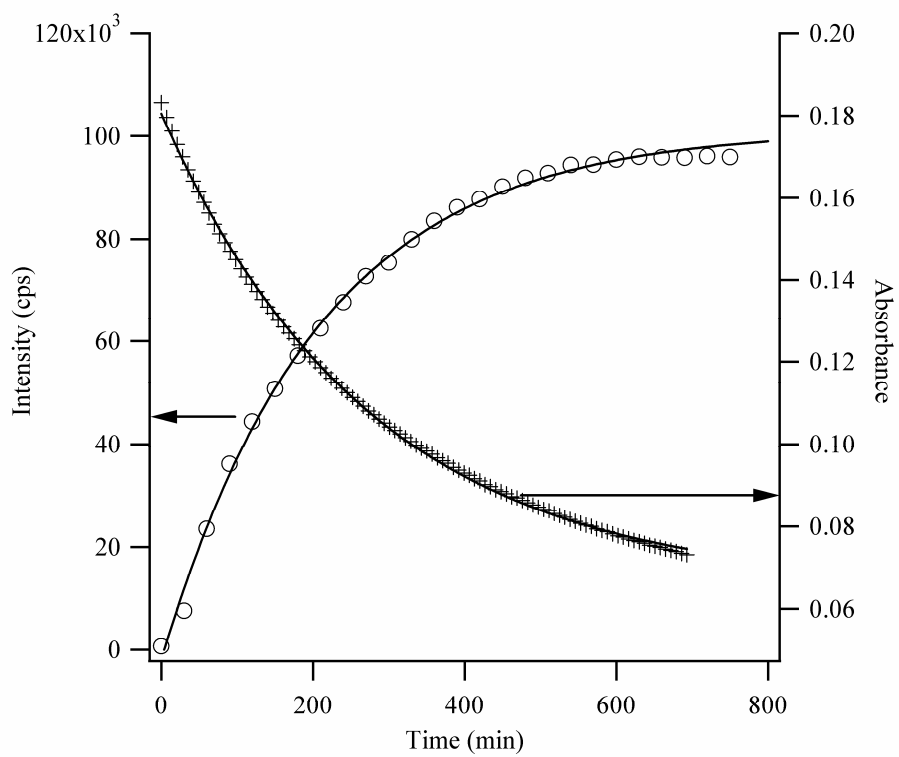

**Figure 4S**

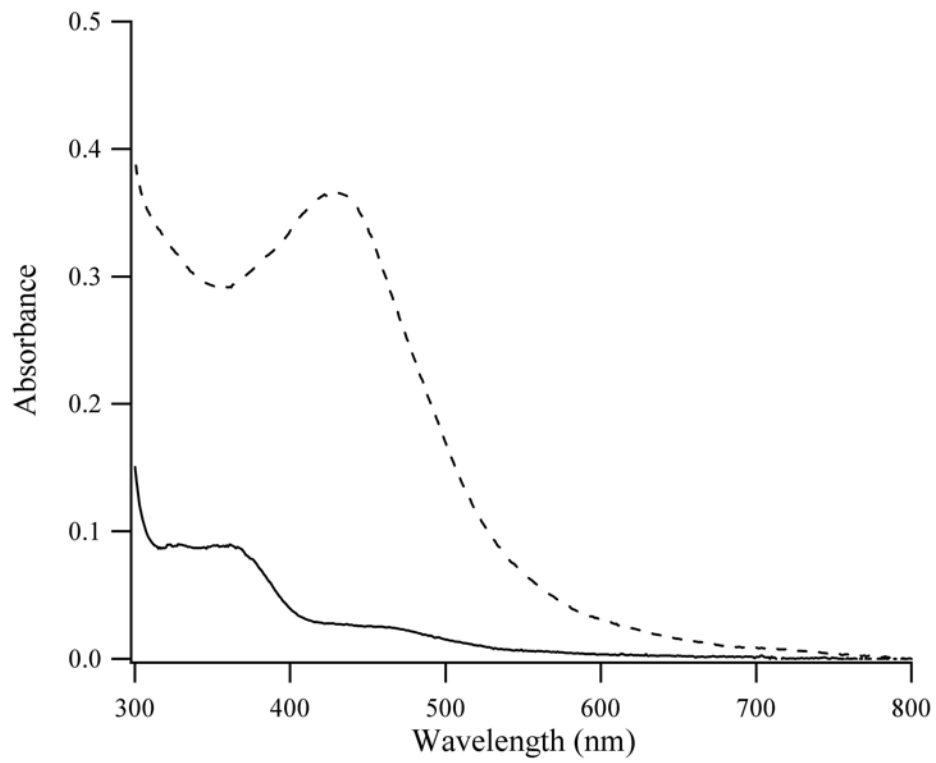

**Figure 5S**

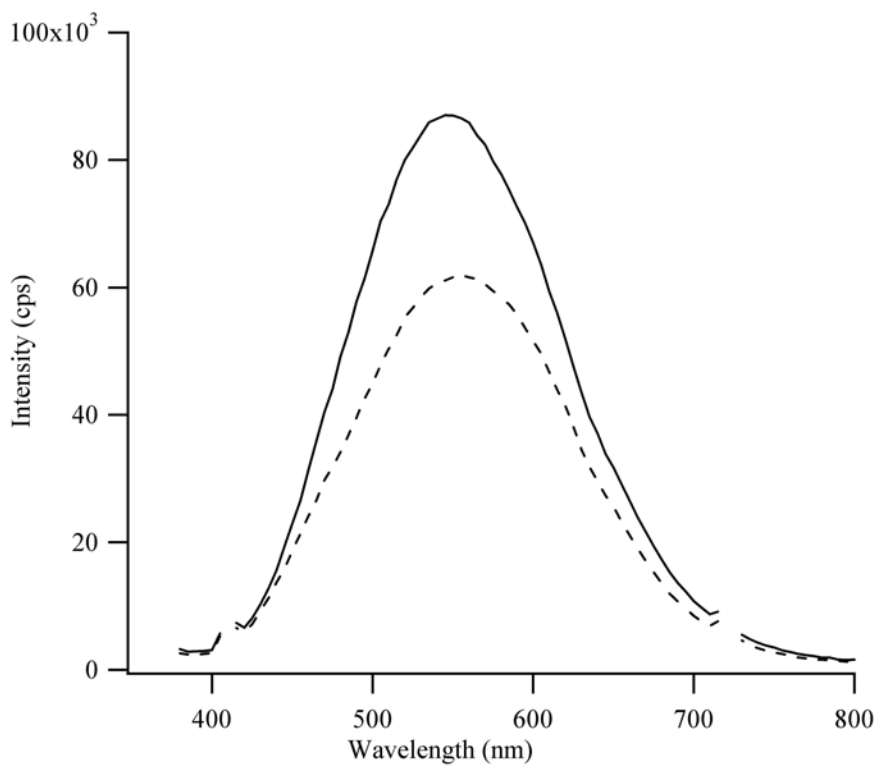

**Figure 6S**



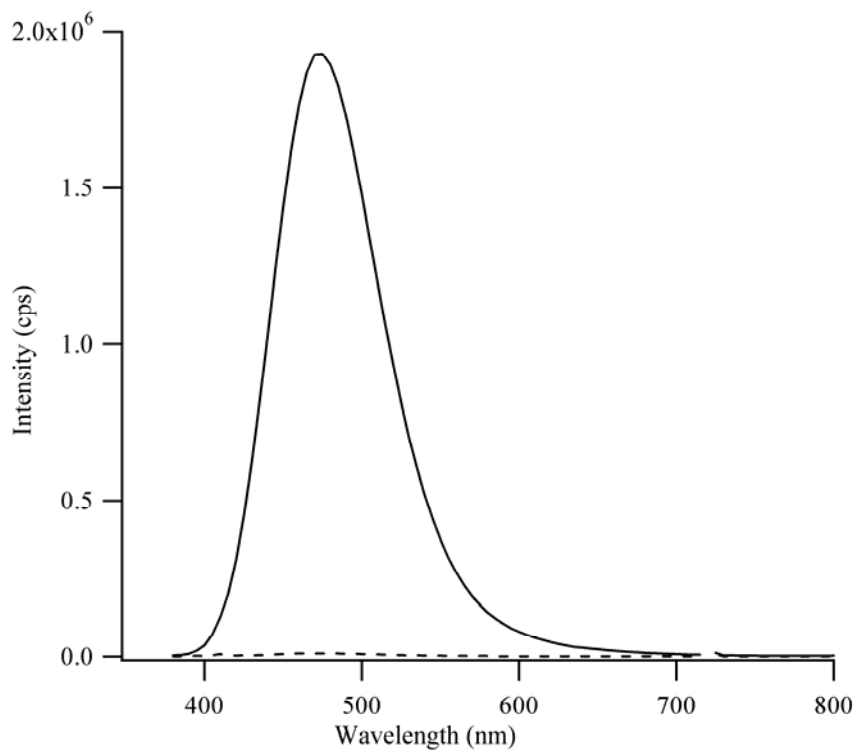

**Figure 7S**

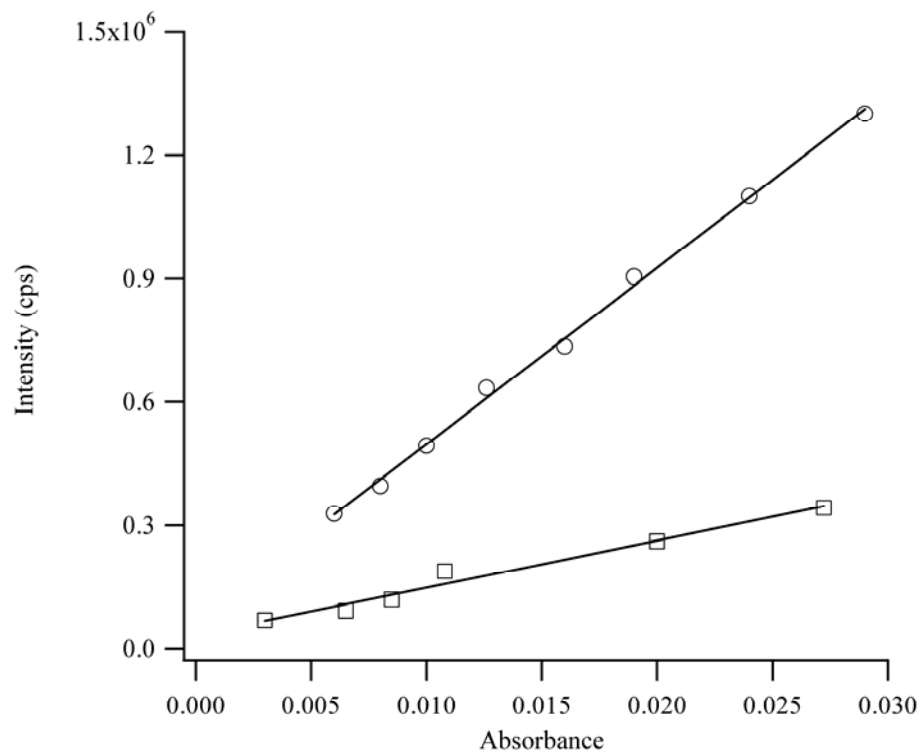

**Figure 8S**

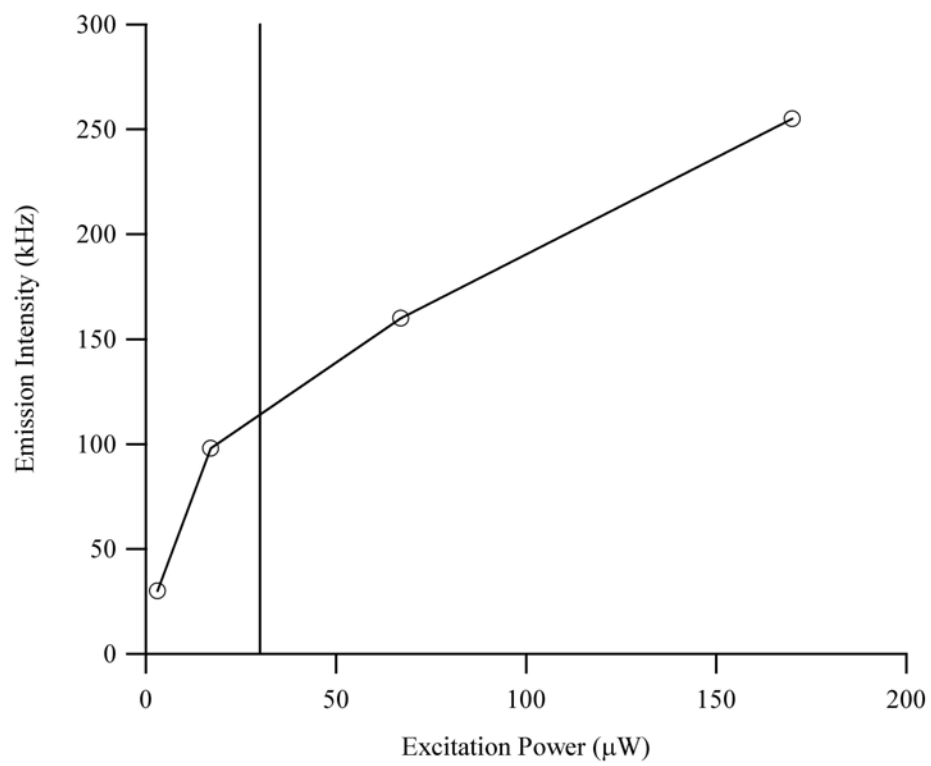

**Figure 9S**

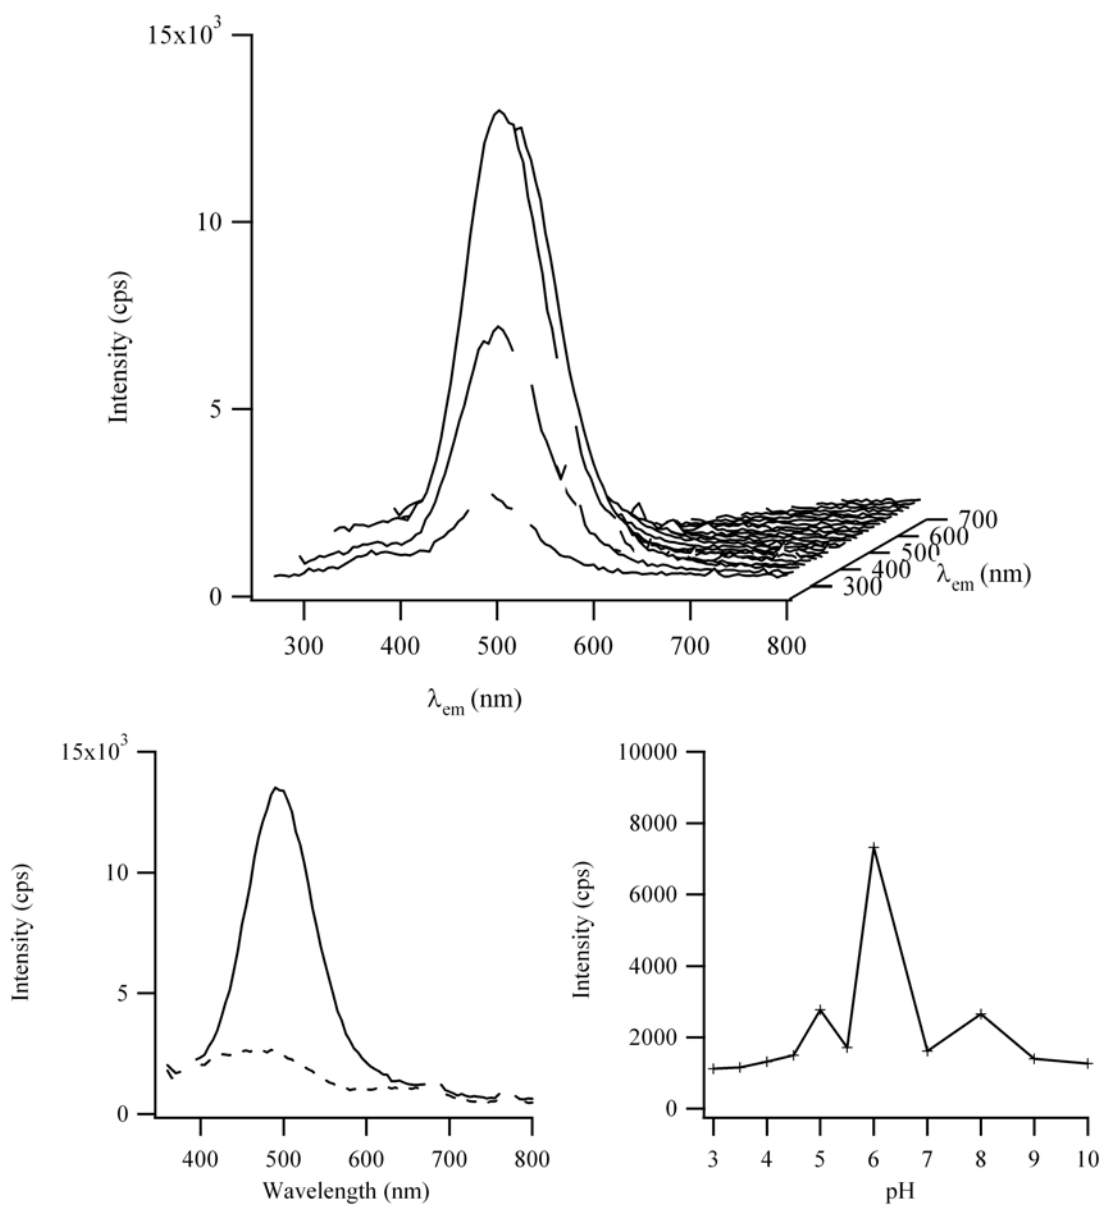

**Figure 10S**
